# Supplementary material for: Do sheep (Ovis aries) discriminate human emotional odors?
Source: PubMed Central journal article supplement (PMC11282138; doi:10.1007/s10071-024-01895-1), 2024-07-26
Supplement: 10071_2024_1895_MOESM1_ESM.pdf [file 10071_2024_1895_MOESM1_ESM.pdf]

## Supplementary Materiel

Title: **Do sheep (*Ovis aries*) discriminate human emotional odors?**

Journal Name : Animal Cognition

Izia Larrigaldie<sup>1</sup>, Fabrice Damon<sup>1</sup>, Solène Mousqué<sup>1,3</sup>, Bruno Patris<sup>1</sup>, Léa Lansade<sup>2</sup>, Benoist Schaal<sup>1</sup>, Alexandra Destrez<sup>1,3</sup>

<sup>1</sup>Développement of Olfaction in Cognition and Communication Lab, Centre des Sciences du Goût, CNRS, Institut Agro Dijon, Univ. Bourgogne, INRAE, Dijon, France

<sup>2</sup>Unité de Physiologie de la Reproduction et des Comportements, CNRS, IFCE, INRAE, Univ. Tours, Nouzilly, France

<sup>3</sup>Institut Agro Dijon, Dijon, France

e-mail address of the corresponding author: **izia.larrigaldie@u-bourgogne.fr**

**Supplemental table 1** Intra-class correlation coefficients (ICC2) for the double coding of videos and their 95% confidence intervals (CI)

|                              | <b>Sexe</b> | <b>ICC2 for behaviour frequencies and IC at<br/>95%</b> | <b>ICC2 for behaviour durations and IC at<br/>95%</b> |
|------------------------------|-------------|---------------------------------------------------------|-------------------------------------------------------|
| <b>Behaviours</b>            | Females     | 0.96 and [0.95 ; 0.97]                                  | 0.98 and [0.97 ; 0.98]                                |
|                              | Males       | 0.86 and [0.82 ; 0.89]                                  | 0.94 and [0.91 ; 0.95]                                |
| <b>Animal's<br/>position</b> | Females     | 0.71 and [0.59 ; 0.79]                                  | 0.97 and [0.96 ; 0.98]                                |
|                              | Males       | 0.93 and [0.89 ; 0.95]                                  | 0.99 and [0.98 ; 0.99]                                |
| <b>Ears positions</b>        | Females     | 0.78 and [0.68 ; 0.85]                                  | 0.95 and [0.93 ; 0.97]                                |
|                              | Males       | 0.80 and [0.70 ; 0.86]                                  | 0.90 and [0.85 ; 0.93]                                |

**Supplemental table 2** Results (mean score  $\pm$  SD) of the habituation-dishabituation test and normality residuals test for male lambs for the habituation phase, with “D” for duration and “O” for occurrence, \*  $p < .05$  (O1.1 vs. O1.4 refer to the stimuli in the habituation-dishabituation test, see text)

|                    |                            | Odor Presentation |                   | Mixed Model Results   |                          |
|--------------------|----------------------------|-------------------|-------------------|-----------------------|--------------------------|
|                    |                            | O1.1              | O1.4              | Shapiro test p-values | Kolmogorov test p-values |
| Animal's Positions | D_Proximal area            | 34.06 $\pm$ 16.68 | 24.47 $\pm$ 21.75 | .594                  | .569                     |
|                    | D_Intermediate area        | 6.55 $\pm$ 6.05   | 15.07 $\pm$ 12.89 | .131                  | .856                     |
|                    | D_Distal area              | 18.98 $\pm$ 13.86 | 20.14 $\pm$ 17.45 | .602                  | .837                     |
|                    | O_Proximal area            | 3.15 $\pm$ 1.62   | 1.71 $\pm$ 1.20   | .134                  | .334                     |
|                    | O_Intermediate area        | 2.76 $\pm$ 2.20   | 2.5 $\pm$ 1.99    | .879                  | .953                     |
|                    | O_Distal area              | 2.15 $\pm$ 1.51   | 2.07 $\pm$ 1.63   | .259                  | .759                     |
| Behaviors          | D_Attraction behaviors     | 22.57 $\pm$ 18.16 | 6.67 $\pm$ 9.96   | .092                  | .433                     |
|                    | D_Aversion behaviors       | 22.97 $\pm$ 18.39 | 27.05 $\pm$ 30.35 | .107                  | .328                     |
|                    | O_Attraction behaviors     | 2.5 $\pm$ 1.65    | 1.21 $\pm$ 1.42   | <b>.015*</b>          | .617                     |
|                    | O_Aversion behaviors       | 5.35 $\pm$ 3.81   | 5.21 $\pm$ 3.06   | .354                  | .745                     |
| Ears               | D_Positive Emotion         | 27.68 $\pm$ 14.46 | 23.75 $\pm$ 16.13 | .298                  | .95                      |
|                    | D_Negative Emotion         | 29.01 $\pm$ 15.19 | 32.13 $\pm$ 15.97 | .207                  | .61                      |
|                    | O_Positive Emotion         | 3.78 $\pm$ 1.87   | 3.35 $\pm$ 1.39   | .915                  | 1                        |
|                    | O_Negative Emotion         | 6.57 $\pm$ 3.89   | 6.42 $\pm$ 2.98   | .088                  | .981                     |
|                    | O_Total Change of position | 10.35 $\pm$ 4.40  | 9.78 $\pm$ 3.80   | .424                  | .942                     |

**Supplemental table 3** Results (mean score  $\pm$  SD) of the habituation-dishabituation test and normality residuals test for male lambs for the habituation phase, with “D” for duration and “O” for occurrence, \*  $p < .05$  (O1.4 vs. O2.1 refer to the stimuli in the habituation-dishabituation test, see text)

|                   |                            | Odor Presentation |                   | Mixed Model Results   |                          |
|-------------------|----------------------------|-------------------|-------------------|-----------------------|--------------------------|
|                   |                            | O1.4              | O2.1              | Shapiro test p-values | Kolmogorov test p-values |
| Animals Positions | D_Proximal area            | 24.47 $\pm$ 21.75 | 24.85 $\pm$ 18.33 | .577                  | .995                     |
|                   | D_Intermediate area        | 15.07 $\pm$ 12.89 | 18.89 $\pm$ 15.37 | <b>.034*</b>          | .411                     |
|                   | D_Distal area              | 20.14 $\pm$ 17.45 | 16.07 $\pm$ 15.08 | .258                  | .629                     |
|                   | O_Proximal area            | 1.71 $\pm$ 1.20   | 2.14 $\pm$ 0.66   | .111                  | .25                      |
|                   | O_Intermediate area        | 2.5 $\pm$ 1.99    | 2.78 $\pm$ 1.71   | .067                  | .892                     |
|                   | O_Distal area              | 2.07 $\pm$ 1.63   | 1.85 $\pm$ 1.65   | .654                  | .803                     |
| Behaviors         | D_Attraction behaviors     | 6.675 $\pm$ 9.96  | 7.05 $\pm$ 11.04  | <b>.011*</b>          | .176                     |
|                   | D_Aversion behaviors       | 27.05 $\pm$ 30.35 | 26.18 $\pm$ 15.78 | .242                  | .58                      |
|                   | O_Attraction behaviors     | 1.21 $\pm$ 1.42   | 1.35 $\pm$ 1.21   | <b>.012*</b>          | .617                     |
|                   | O_Aversion behaviors       | 5.21 $\pm$ 3.06   | 6.42 $\pm$ 2.76   | <b>.024*</b>          | .305                     |
| Ears              | D_Positive Emotion         | 23.75 $\pm$ 16.13 | 20.36 $\pm$ 12.94 | .335                  | .578                     |
|                   | D_Negative Emotion         | 32.13 $\pm$ 15.97 | 35.92 $\pm$ 13.18 | .534                  | .971                     |
|                   | O_Positive Emotion         | 3.35 $\pm$ 1.39   | 3.14 $\pm$ 1.56   | .664                  | .691                     |
|                   | O_Negative Emotion         | 6.42 $\pm$ 2.98   | 8.64 $\pm$ 4.97   | .369                  | .905                     |
|                   | O_Total Change of position | 9.78 $\pm$ 3.80   | 11.78 $\pm$ 5.22  | 1                     | .987                     |

**Supplemental table 4** Results (mean score  $\pm$  SD) of the habituation-dishabituation test and normality residuals test for female lambs for the habituation phase, with “D” for duration and “O” for occurrence, \*  $p < .05$  (O1.1 vs. O1.4 refer to the stimuli in the habituation-dishabituation test, see text)

|                    |                            | Odor Presentation |                   | Results of residual normality test |                          |
|--------------------|----------------------------|-------------------|-------------------|------------------------------------|--------------------------|
|                    |                            | O1.1              | O1.4              | Shapiro test p-values              | Kolmogorov test p-values |
| Animal's Positions | D_Proximal area            | 53.15 $\pm$ 6.26  | 49.30 $\pm$ 13.41 | <b>.004**</b>                      | .376                     |
|                    | D_Intermediate area        | 3.05 $\pm$ 5.05   | 3.39 $\pm$ 3.21   | <b>&lt;.001***</b>                 | .447                     |
|                    | D_Distal area              | 3.42 $\pm$ 3.91   | 7.23 $\pm$ 11.36  | <b>&lt;.001***</b>                 | .126                     |
|                    | O_Proximal area            | 3.85 $\pm$ 2.10   | 4.07 $\pm$ 1.43   | .141                               | .71                      |
|                    | O_Intermediate area        | 1.5 $\pm$ 1.55    | 2.07 $\pm$ 1.81   | .914                               | .833                     |
|                    | O_Distal area              | 1.21 $\pm$ 0.97   | 1.28 $\pm$ 1.43   | .11                                | .853                     |
| Behaviors          | D_Attraction behaviors     | 39.19 $\pm$ 11.38 | 33.4 $\pm$ 14.84  | .601                               | .916                     |
|                    | D_Aversion behaviors       | 9.46 $\pm$ 8.65   | 12.52 $\pm$ 7.86  | .888                               | .981                     |
|                    | O_Attraction behaviors     | 4.35 $\pm$ 3.97   | 2.85 $\pm$ 1.02   | .822                               | .986                     |
|                    | O_Aversion behaviors       | 3.14 $\pm$ 1.29   | 5.78 $\pm$ 3.74   | .953                               | .960                     |
| Ears               | D_Positive Emotion         | 1.14 $\pm$ 1.58   | 1.06 $\pm$ 2.11   | <b>&lt;.001***</b>                 | .021                     |
|                    | D_Negative Emotion         | 58.06 $\pm$ 2.76  | 55.56 $\pm$ 7.25  | .028                               | .289                     |
|                    | O_Positive Emotion         | 0.71 $\pm$ 0.82   | 0.57 $\pm$ 0.93   | <b>&lt;.001***</b>                 | .087                     |
|                    | O_Negative Emotion         | 5.07 $\pm$ 2.97   | 6.21 $\pm$ 3.16   | .403                               | .87                      |
|                    | O_Total Change of position | 5.78 $\pm$ 3.21   | 6.78 $\pm$ 3.44   | .426                               | .932                     |

**Supplemental table 5** Results (mean score  $\pm$  SD) of the habituation-dishabituation test and normality residuals test for female lambs for the habituation phase, with “D” for duration and “O” for occurrence, \*  $p < .05$ , \*\* $p < .01$ , \*\*\*  $p < .001$  (O1.4 vs. O2.1 refer to the stimuli in the habituation-dishabituation test, see text)

|                    |                            | Odor Presentation |                   | Results of residual normality test |                          |
|--------------------|----------------------------|-------------------|-------------------|------------------------------------|--------------------------|
|                    |                            | O1.4              | O2.1              | Shapiro test p-values              | Kolmogorov test p-values |
| Animal's Positions | D_Proximal area            | 49.30 $\pm$ 13.41 | 45.01 $\pm$ 11.13 | .15                                | .702                     |
|                    | D_Intermediate area        | 3.39 $\pm$ 3.21   | 5.37 $\pm$ 6.24   | .098                               | .715                     |
|                    | D_Distal area              | 7.23 $\pm$ 11.36  | 9.51 $\pm$ 7.57   | .007                               | .745                     |
|                    | O_Proximal area            | 4.07 $\pm$ 1.43   | 3.57 $\pm$ 2.02   | .926                               | .995                     |
|                    | O_Intermediate area        | 2.07 $\pm$ 1.81   | 2.5 $\pm$ 1.91    | .461                               | .475                     |
|                    | O_Distal area              | 1.28 $\pm$ 1.43   | 2 $\pm$ 1.30      | .857                               | .966                     |
| Behaviors          | D_Attraction behaviors     | 33.4 $\pm$ 14.84  | 32.37 $\pm$ 17.15 | .326                               | .617                     |
|                    | D_Aversion behaviors       | 12.52 $\pm$ 7.86  | 16.66 $\pm$ 10.17 | .663                               | .982                     |
|                    | O_Attraction behaviors     | 2.85 $\pm$ 1.02   | 2.35 $\pm$ 1.21   | .218                               | .402                     |
|                    | O_Aversion behaviors       | 5.78 $\pm$ 3.74   | 7.21 $\pm$ 4.87   | .621                               | .938                     |
| Ears               | D_Positive Emotion         | 1.06 $\pm$ 2.11   | 1.99 $\pm$ 3.54   | <b>&lt;.001***</b>                 | .131                     |
|                    | D_Negative Emotion         | 55.56 $\pm$ 7.25  | 56.41 $\pm$ 5.25  | <b>&lt;.001***</b>                 | .447                     |
|                    | O_Positive Emotion         | 0.57 $\pm$ 0.93   | 0.92 $\pm$ 1.43   | <b>.005**</b>                      | .334                     |
|                    | O_Negative Emotion         | 6.21 $\pm$ 3.16   | 8 $\pm$ 4.77      | .492                               | .776                     |
|                    | O_Total Change of position | 6.78 $\pm$ 3.44   | 8.92 $\pm$ 5.34   | .567                               | .85                      |
